# Supplementary material for: Biomarkers of Neurodegeneration in Post-Traumatic Stress Disorder: An Integrative Review
Source: MDPI journal article supplement (doi:10.3390/biomedicines11051465), 2023-05-17
Supplement: s1 [file s1]

**Supplementary Table S1: Search strings for the current review, with numerical results for the PubMed database**

| String                                                                                                                                                                                                                                                               | Number of citations retrieved |
|----------------------------------------------------------------------------------------------------------------------------------------------------------------------------------------------------------------------------------------------------------------------|-------------------------------|
| 1. "post-traumatic stress disorder" OR "posttraumatic stress disorder" OR "PTSD"                                                                                                                                                                                     | 45752                         |
| 2. "neurodegeneration" OR "neurodegenerative" OR "Alzheimer's disease" OR "Alzheimer's dementia" OR "dementia" OR "Parkinson's disease" OR "Parkinsonism"                                                                                                            | 468251                        |
| 3. "biomarker" OR "biomarkers" OR "biological marker" OR "biological markers"                                                                                                                                                                                        | 728059                        |
| 4. "genetic" OR "genetics" OR "epigenetic" OR "epigenetics"                                                                                                                                                                                                          | 4794935                       |
| 5. "immune" OR "immunological" OR "inflammation" OR "inflammatory" OR "immune-inflammatory"                                                                                                                                                                          | 2150684                       |
| 6. "amyloid" OR "amyloid beta" OR "tau protein"                                                                                                                                                                                                                      | 121140                        |
| 7. "endocrine" OR "neuroendocrine"                                                                                                                                                                                                                                   | 262258                        |
| 8. "imaging" OR "neuroimaging" OR "magnetic resonance imaging" OR "functional magnetic resonance imaging" OR "diffusion tensor imaging" OR "positron emission tomography" OR "single photon emission computerized tomography" OR "MRI" OR "fMRI" OR "DTI" OR "SPECT" | 1172740                       |
| 9. 1 AND 2                                                                                                                                                                                                                                                           | 818                           |
| 10. 9 AND (3 OR 4 OR 5 OR 6 OR 7 OR 8)                                                                                                                                                                                                                               | 160                           |
